# Supplementary material
Source: PubMed Central journal article supplement (PMC2638599)
Supplement: ddn257_1.pdf [file ddn257_1.pdf]

**Common variation in the miR-659 binding-site of *GRN* is a major risk factor for  
TDP43-positive frontotemporal dementia**

Rosa Rademakers, Jason L. Eriksen, Matt Baker, Todd Robinson, Zeshan Ahmed, Sarah J. Lincoln, NiCole Finch, Nicola J. Rutherford, Richard J. Crook, Keith A. Josephs, Bradley F. Boeve, David S. Knopman, Ronald C. Petersen, Joseph E. Parisi, Richard J. Caselli, Zbigniew K. Wszolek, Ryan J. Uitti, Howard Feldman, Michael L. Hutton, Ian R. Mackenzie, Neill R. Graff-Radford and Dennis W. Dickson

## SUPPLEMENTARY RESULTS

### *Detailed genetic analyses of GRN genomic region*

To study whether rs5848 is the likely functional variant underlying the association with FTL-D-U or whether another genetic variant in linkage disequilibrium (LD) with rs5848 could be responsible for the observed association we performed a detailed genetic analyses of the *GRN* genomic region. First, we determined the LD structure of *GRN* by sequencing 10.2 kb of *GRN* (UCSC genome browser, chr17:39775969-39785997), including 2kb upstream of the non-coding exon 0 and the complete 3'UTR, in 24 US individuals. In total, we identified 27 genetic variants of which 20 were observed more than once in the 48 chromosomes and were considered informative to determine the *GRN* LD haplotype structure (**Supplementary Figure S1**). Haplotype blocks were selected based on the algorithm defined by Gabriel et al. (2002)<sup>68</sup> using the Haploview software package v2.03. The first 14 SNPs were part of a single ~5kb haplotype block including the *GRN* promoter, 2kb of regulatory sequences, the non-coding exon 0 and intron 0 (defined as *GRN* promoter haplotype block) (**Supplementary Figure S1**). In contrast, little LD was observed in the *GRN* coding region, with the exception of two variants located in close proximity of *GRN* exon 4 (rs34424835 and rs850713). Importantly, none of the variants was in LD with rs5848 ( $D' \leq 0.68$ ;  $r^2 \leq 0.37$ ). In fact, using the genotype information available in the HapMap project we determined that rs5848 is located at the start of another more downstream haplotype block of ~24kb outside of *GRN* (**Supplementary Figure S2**).

We selected 13 SNPs to perform single SNP and haplotype association analyses in the FTL-D-U patient-control series: 8 tagging SNPs identified in the genomic

sequencing analyses that together capture 94% of the genetic diversity in the *GRN* region and 5 SNPs in considerable LD with rs5848 selected from the downstream haplotype block based on the HapMap data (**Figure 1**). Single SNP logistic regression analyses did not identify variants that were more strongly associated with FTL-D-U than rs5848, although significant association with 4 of the 5 SNPs from the downstream haplotype block was observed ( $p_{\text{adjusted}}=0.04$ ) (**Supplementary Table S1**). Haplotype association analyses adjusted for age and gender did not reveal significant association in the *GRN* promoter haplotype block, however borderline significance was obtained with Hap C (TCCGinsTGT), carrying the rs5848 risk T-allele, in the complete *GRN* genomic region ( $p_{\text{adjusted}}=0.04$ ) (**Supplementary table S2**). However, when rs5848 was excluded from the analyses significant association was no longer observed ( $p_{\text{adjusted}}=0.11$ ). Similarly, haplotype analyses in the downstream haplotype block showed a significant increase in Hap B (TACACC) from 30.3% in control individuals to 42.3% in FTL-D-U patients ( $p_{\text{adjusted}}=0.02$ ), which was no longer observed when rs5848 was excluded. Together these results strongly support the hypothesis that rs5848 is the functional variant in *GRN* associated with FTL-D-U, rather than another variant in LD with rs5848 or a haplotype tagged by the T-allele of rs5848.

### ***GRN haplotype diversity in homozygous rs5848 T-allele carriers***

To provide additional evidence in favor of rs5848 being the functional variant we determined whether the risk T-allele in our patient population is found on different *GRN* haplotypic backgrounds. We genotyped 8 genetic variants covering the complete 8 kb *GRN* genomic region in a cohort of 35 FTL-D patients from the Mayo Clinic FTL-D series that were homozygous for the T-allele at rs5848. Within this population haplotype

estimations using Arlequin revealed 11 different haplotypes, including 8 haplotypes with frequencies > 5% (**Supplementary Table S3**). Based on the individual genotype data in our patient cohort, only 2 out of 35 FTLN patients (5.7%) were homozygous for the same haplotype (Hap B), while three FTLN patients were homozygous for other *GRN* haplotypes (one Hap C, one Hap H and one Hap I). When we included 2 simple tandem repeat (STR) markers flanking *GRN* (D17S1860 and GRN\_GT15), spanning a total region of 65 kb, haplotype estimation revealed 40 possible haplotypes and none of the 35 patients were homozygous. These data are in agreement with the lack of LD in the *GRN* genomic region and support the hypothesis that the rs5848 T-allele is found on different *GRN* haplotypic backgrounds.

## SUPPLEMENTARY TABLES

Supplementary table S1. Single SNP association analyses.

| SNP           | Genotypes | Controls<br>(N=433) |             | Patients<br>(N=59) |             | P <sub>adjusted</sub> | OR          | 95% CI           |
|---------------|-----------|---------------------|-------------|--------------------|-------------|-----------------------|-------------|------------------|
|               |           | N                   | %           | N                  | %           |                       |             |                  |
| rs4792937     | TT        | 145                 | 33.5        | 22                 | 37.3        | -                     | -           | -                |
|               | CT        | 210                 | 48.5        | 24                 | 40.7        | 0.46                  | 0.79        | 0.42-1.48        |
|               | CC        | 78                  | 18.0        | 13                 | 22.0        | 0.55                  | 1.26        | 0.59-2.70        |
| rs2879096     | CC        | 244                 | 56.4        | 34                 | 57.6        | -                     | -           | -                |
|               | CT        | 150                 | 34.6        | 18                 | 30.5        | 0.72                  | 0.90        | 0.48-1.66        |
|               | TT        | 39                  | 9.0         | 7                  | 11.9        | 0.38                  | 1.50        | 0.61-3.68        |
| c.-7-320C>G   | CC        | 380                 | 87.8        | 53                 | 89.8        | -                     | -           | -                |
|               | CG        | 48                  | 11.1        | 6                  | 10.2        | 0.92                  | 0.95        | 0.39-2.35        |
|               | GG        | 5                   | 1.2         | 0                  | 0           | n/a                   | n/a         | n/a              |
| rs9897526     | GG        | 337                 | 77.8        | 47                 | 79.7        | -                     | -           | -                |
|               | AG        | 90                  | 20.8        | 11                 | 18.6        | 0.60                  | 0.83        | 0.41-1.68        |
|               | AA        | 6                   | 1.4         | 1                  | 1.7         | 0.92                  | 1.12        | 0.13-9.75        |
| rs34424835    | wt/wt     | 245                 | 56.6        | 28                 | 47.5        | -                     | -           | -                |
|               | wt/ins    | 158                 | 36.5        | 25                 | 42.4        | 0.29                  | 1.37        | 0.77-2.46        |
|               | ins/ins   | 30                  | 6.9         | 6                  | 10.2        | 0.25                  | 1.77        | 0.67-4.64        |
| rs25646       | TT        | 408                 | 94.2        | 55                 | 93.2        | -                     | -           | -                |
|               | CT        | 25                  | 5.8         | 4                  | 6.8         | 0.71                  | 1.23        | 0.41-3.71        |
|               | CC        | 0                   | 0           | 0                  | 0           | n/a                   | n/a         | n/a              |
| c.835+7G>A    | GG        | 376                 | 86.8        | 51                 | 86.4        | -                     | -           | -                |
|               | AG        | 54                  | 12.5        | 8                  | 13.6        | 0.69                  | 1.18        | 0.53-2.64        |
|               | AA        | 3                   | 0.7         | 0                  | 0           | n/a                   | n/a         | n/a              |
| <b>rs5848</b> | <b>CC</b> | <b>199</b>          | <b>46.0</b> | <b>21</b>          | <b>35.6</b> | <b>-</b>              | <b>-</b>    | <b>-</b>         |
|               | <b>CT</b> | <b>191</b>          | <b>44.1</b> | <b>23</b>          | <b>39.0</b> | <b>0.74</b>           | <b>1.12</b> | <b>0.59-2.10</b> |
|               | <b>TT</b> | <b>43</b>           | <b>9.9</b>  | <b>15</b>          | <b>25.4</b> | <b>0.003</b>          | <b>3.18</b> | <b>1.50-6.73</b> |
| rs708384      | CC        | 157                 | 36.3        | 17                 | 28.8        | -                     | -           | -                |
|               | AC        | 210                 | 48.5        | 25                 | 42.4        | 0.75                  | 1.11        | 0.59-2.14        |
|               | AA        | 66                  | 15.2        | 17                 | 28.8        | 0.04                  | 2.20        | 1.04-4.63        |
| rs850737      | TT        | 148                 | 34.2        | 18                 | 30.5        | -                     | -           | -                |
|               | CT        | 206                 | 47.6        | 22                 | 37.3        | 0.72                  | 0.89        | 0.46-1.72        |
|               | CC        | 79                  | 18.2        | 19                 | 32.2        | 0.08                  | 1.90        | 0.94-3.86        |
| rs5910        | GG        | 151                 | 34.9        | 18                 | 30.5        | -                     | -           | -                |
|               | AG        | 210                 | 48.5        | 22                 | 37.3        | 0.73                  | 0.89        | 0.46-1.73        |
|               | AA        | 72                  | 16.6        | 19                 | 32.2        | 0.04                  | 2.13        | 1.05-4.34        |
| rs5911        | AA        | 152                 | 35.1        | 18                 | 30.5        | -                     | -           | -                |
|               | AC        | 209                 | 48.3        | 22                 | 37.3        | 0.75                  | 0.90        | 0.46-1.75        |
|               | CC        | 72                  | 16.6        | 19                 | 32.2        | 0.04                  | 2.14        | 1.05-4.36        |
| rs850730      | GG        | 152                 | 35.1        | 18                 | 30.5        | -                     | -           | -                |
|               | CG        | 209                 | 48.3        | 22                 | 37.3        | 0.75                  | 0.90        | 0.46-1.75        |
|               | CC        | 72                  | 16.6        | 19                 | 32.2        | 0.04                  | 2.14        | 1.05-4.36        |

<sup>a</sup> Age and gender adjusted odds ratios (OR) are shown for carriers of one rare allele and for carriers of two rare alleles, each compared to homozygote carriers of the frequent allele (reference).

**Supplementary table S2. Haplotype analyses in *GRN* genomic region and downstream haplotype block.**

| Haplotypes <sup>a</sup>                                                                                                                             |            | Control individuals<br>N=433 (%) | Patients<br>N=59 (%) | P <sub>adjusted</sub> <sup>b</sup> |
|-----------------------------------------------------------------------------------------------------------------------------------------------------|------------|----------------------------------|----------------------|------------------------------------|
| <b><i>GRN</i> promoter haplotype block: rs4792937 – rs2879096 – c.-7-320C&gt;G</b>                                                                  |            |                                  |                      |                                    |
|                                                                                                                                                     |            |                                  |                      | 0.81 <sup>c</sup>                  |
| Hap A                                                                                                                                               | TCC        | 56.8                             | 56.6                 | 0.70                               |
| Hap B                                                                                                                                               | CTC        | 26.3                             | 26.1                 | 0.83                               |
| Hap C                                                                                                                                               | CCC        | 10.1                             | 12.4                 | 0.54                               |
| Hap D                                                                                                                                               | CCG        | 5.8                              | 3.1                  | 0.44                               |
| <b>Complete <i>GRN</i> genomic region: rs4792937 – rs2879096 – c.7.320C&gt;G – rs9897526 – rs3442485 – rs25646 – c.835+7G&gt;A – rs5848</b>         |            |                                  |                      |                                    |
|                                                                                                                                                     |            |                                  |                      | 0.27 <sup>c</sup>                  |
| Hap A                                                                                                                                               | TCCGwtTGC  | 26.3                             | 27.0                 | 0.21                               |
| Hap B                                                                                                                                               | CTCGwtTGC  | 16.2                             | 16.1                 | 0.74                               |
| Hap C                                                                                                                                               | TCCGinsTGT | 7.1                              | 13.5                 | 0.04                               |
| Hap D                                                                                                                                               | TCCGwtTGT  | 6.7                              | 7.3                  | 0.24                               |
| Hap E                                                                                                                                               | TCCGwtTAC  | 6.4                              | 2.6                  | 0.66                               |
| <b>Complete <i>GRN</i> genomic region excluding rs5848: rs4792937 – rs2879096 – c.7.320C&gt;G – rs9897526 – rs3442485 – rs25646 – c.835+7G&gt;A</b> |            |                                  |                      |                                    |
|                                                                                                                                                     |            |                                  |                      | 0.51 <sup>c</sup>                  |
| Hap A                                                                                                                                               | TCCGwtTG   | 33.0                             | 32.2                 | 0.66                               |
| Hap B                                                                                                                                               | CTCGwtTG   | 18.1                             | 20.4                 | 0.72                               |
| Hap C                                                                                                                                               | TCCGinsTG  | 9.6                              | 15.6                 | 0.11                               |
| Hap D                                                                                                                                               | TCCGwtTA   | 6.4                              | 2.6                  | 0.57                               |
| <b><i>GRN</i> downstream block: rs5848 – rs708384 – rs850737 – rs5910 – rs5911 – rs850730</b>                                                       |            |                                  |                      |                                    |
|                                                                                                                                                     |            |                                  |                      | 0.11 <sup>c</sup>                  |
| Hap A                                                                                                                                               | CCTGAG     | 57.6                             | 47.4                 | 0.06                               |
| Hap B                                                                                                                                               | TACACC     | 30.3                             | 42.3                 | 0.02                               |
| Hap C                                                                                                                                               | CACACC     | 8.9                              | 6.8                  | 0.53                               |
| <b><i>GRN</i> downstream block excluding rs5848: rs708384 – rs850737 – rs5910 – rs5911 – rs850730</b>                                               |            |                                  |                      |                                    |
|                                                                                                                                                     |            |                                  |                      | 0.17 <sup>c</sup>                  |
| Hap A                                                                                                                                               | CTGAG      | 57.8                             | 48.3                 | 0.07                               |
| Hap B                                                                                                                                               | ACACC      | 39.2                             | 49.1                 | 0.06                               |

<sup>a</sup> Haplotypes with an average frequency <5% were excluded from the analysis. The risk T-allele of rs5848 is shown in bold.

<sup>b</sup> Simulated p-values corrected for age (age at death in patients, inclusion age for control individuals) and gender.

<sup>c</sup> Global p-values.

**Supplementary Table S3. Estimated frequencies of 8 kb *GRN* haplotypes containing the rs5848 T-allele.**

| ID    | Haplotype                  | Frequency (%) |
|-------|----------------------------|---------------|
| Hap A | T C G G wt T A G <b>T</b>  | 26.7          |
| Hap B | T C G G ins T G G <b>T</b> | 18.4          |
| Hap C | C C G G wt T A G <b>T</b>  | 11.4          |
| Hap D | C T G G wt T A G <b>T</b>  | 10.0          |
| Hap E | C T G G ins T G G <b>T</b> | 7.9           |
| Hap F | C T G A wt T A G <b>T</b>  | 7.7           |
| Hap G | T C G A ins T G G <b>T</b> | 6.4           |
| Hap H | C T G A ins T G G <b>T</b> | 5.9           |
| Hap I | T C G G ins T A G <b>T</b> | 2.9           |
| Hap J | C C G A wt C A G <b>T</b>  | 1.4           |
| Hap K | C C C G wt T A G <b>T</b>  | 1.4           |

**Note.** Haplotypes are composed of rs4792937, rs2879096, c.7-320C>G, rs9897526, rs34424835, rs25646, rs850713, c.835+7G>A and rs5848 (cDNA numbering relative to NM\_002087.2 starting at the translation initiation codon. The risk T-allele of rs5848 is shown in bold.

**Supplementary Table S4. Predicted miRNA target sites in *GRN* 3'UTR.**

| miRNA              | 3'UTR Position |           | miRNA           | 3'UTR Position |     |
|--------------------|----------------|-----------|-----------------|----------------|-----|
|                    | Start          | End       |                 | Start          | End |
| hsa-miR-924        | 1              | 20        | hsa-miR-631     | 216            | 237 |
| hsa-miR-101        | 1              | 14        | hsa-miR-502-3p  | 218            | 240 |
| hsa-miR-604        | 7              | 27        | hsa-miR-500*    | 218            | 239 |
| hsa-miR-296-3p     | 10             | 29        | hsa-miR-501-3p  | 218            | 240 |
| hsa-miR-516a-5p    | 12             | 34        | hsa-miR-519e    | 218            | 239 |
| hsa-miR-526b       | 12             | 34        | hsa-miR-518c    | 219            | 241 |
| hsa-miR-525-5p     | 14             | 34        | hsa-miR-339-3p  | 219            | 240 |
| hsa-miR-23a*       | 15             | 37        | hsa-miR-523     | 219            | 241 |
| hsa-miR-23b*       | 15             | 37        | hsa-miR-518e    | 220            | 240 |
| hsa-miR-615-5p     | 16             | 38        | hsa-miR-519d    | 220            | 241 |
| hsa-miR-193b*      | 17             | 38        | hsa-miR-518a-3p | 220            | 241 |
| rno-miR-336        | 30             | 50        | hsa-miR-525-3p  | 220            | 241 |
| hsa-miR-506        | 35             | 54        | hsa-miR-518f    | 221            | 241 |
| hsa-miR-342-5p     | 58             | 78        | hsa-miR-330-3p  | 221            | 242 |
| <b>hsa-miR-659</b> | <b>68</b>      | <b>89</b> | hsa-miR-518d-3p | 221            | 241 |
| hsa-miR-198        | 82             | 102       | hsa-miR-518b    | 221            | 241 |
| hsa-miR-615-5p     | 84             | 105       | hsa-miR-524-3p  | 221            | 241 |
| hsa-miR-939        | 96             | 119       | hsa-miR-135a*   | 228            | 248 |
| hsa-miR-920        | 99             | 118       | hsa-miR-299-3p  | 232            | 254 |
| hsa-miR-617        | 113            | 135       | hsa-miR-888*    | 243            | 264 |
| hsa-miR-136        | 116            | 138       | hsa-miR-506     | 243            | 263 |
| hsa-miR-296-5p     | 121            | 141       | hsa-miR-30e     | 245            | 264 |
| hsa-miR-151-3p     | 128            | 148       | hsa-miR-485-3p  | 248            | 270 |
| hsa-miR-187*       | 157            | 178       | hsa-miR-377     | 250            | 270 |
| hsa-miR-96         | 158            | 180       | hsa-miR-603     | 250            | 270 |
| hsa-miR-18b*       | 159            | 178       | hsa-miR-342-3p  | 250            | 271 |
| hsa-miR-744*       | 161            | 182       | hsa-miR-933     | 253            | 274 |
| hsa-miR-644        | 170            | 189       | hsa-miR-560     | 255            | 275 |
| hsa-miR-142-3p     | 170            | 192       | hsa-miR-574-3p  | 261            | 282 |
| hsa-miR-542-5p     | 183            | 207       | hsa-miR-523     | 261            | 283 |
| hsa-miR-483-5p     | 195            | 215       | hsa-miR-487b    | 262            | 283 |
| hsa-miR-674        | 199            | 220       | hsa-miR-139-3p  | 264            | 285 |
| hsa-miR-181a-2*    | 200            | 221       | hsa-miR-19a     | 276            | 299 |
| hsa-miR-220c       | 207            | 229       | hsa-miR-19b     | 276            | 299 |
| hsa-miR-140-3p     | 211            | 231       | hsa-miR-568     | 280            | 300 |
| hsa-miR-588        | 215            | 233       | hsa-let-7g*     | 280            | 300 |
| hsa-miR-193a-3p    | 215            | 235       | hsa-miR-648     | 284            | 302 |

**Note.** 3'UTR position starts from first base after TGA stop codon. Target sites predicted based on version 5 of the miRBASE registry (<http://microrna.sanger.ac.uk/>). A total of 70 different miRNAs are predicted to bind to the 304 bp 3'UTR of *GRN*, but only miR-659 is predicted to be affected by rs5848, located 78 nucleotides downstream of the ATG stop codon.

**Supplementary Table S5. Information on Taqman genotyping assays.**

| Position relative to <i>GRN</i> | dbSNP ID  | <i>ABI TaqMan</i> Assay | PCR Primers                                         | Reporter primers (Dye)                                 |
|---------------------------------|-----------|-------------------------|-----------------------------------------------------|--------------------------------------------------------|
| GRN c.-4671C>T                  | rs4792937 | Custom assay            | F: GAGCGAGCCAGCTCAGTAG<br>R: GCTCCCAAAGCGATTCTCCTA  | CTGGGATTACAAATGTGAG (VIC)<br>CTGGGATTACAAGTGTGAG (FAM) |
| GRN c.-2977C>T                  | rs2879096 | C__15835934_10          | N/A                                                 | N/A                                                    |
| GRN c.-327C>G                   | N/A       | Custom assay            | F: CTGCACAGATCAGACCCACAA<br>R: CACTGGGCAGGCTTATGAGA | TCAGGAAGACGTGATTT (VIC)<br>TCAGGAAGACCTGATTT (FAM)     |
| GRN c.264+21G>A                 | rs9897526 | C__2548248_10           | N/A                                                 | N/A                                                    |
| GRN c.384T>C (D128D)            | rs25646   | C__14929_10             | N/A                                                 | N/A                                                    |
| GRN c.835+7G>A                  | N/A       | Custom assay            | F: ACGGACCTCCTCACTAAGCT<br>R: GCCCCACCCCTGTATCTG    | ACAGGTACCAGAGGCA (VIC)<br>AGGTACCAAAGGCA (FAM)         |
| GRN c.*78C>T                    | rs5848    | C__7452046_20           | N/A                                                 | N/A                                                    |
| Downstream of <i>GRN</i>        | rs708384  | C__2259468_10           | N/A                                                 | N/A                                                    |
| Downstream of <i>GRN</i>        | rs850737  | C__2548239_10           | N/A                                                 | N/A                                                    |
| Downstream of <i>GRN</i>        | rs5910    | C__2548233_10           | N/A                                                 | N/A                                                    |
| Downstream of <i>GRN</i>        | rs5911    | C__3017440_10           | N/A                                                 | N/A                                                    |
| Downstream of <i>GRN</i>        | rs850730  | C__11880722_20          | N/A                                                 | N/A                                                    |

**Supplementary Table S6. Information on marker genotyping assays.**

| <b>Marker</b> | <b>UCSC genome browser position (Mar. 2006)</b> | <b>Primers</b>                                               |
|---------------|-------------------------------------------------|--------------------------------------------------------------|
| rs34424835    | chr17:39783076-39783075                         | F: TAGTGTCACCCTCAAACCCCAGT-FAM<br>R: CCACGGAGTTGTTACCTGTGGAC |
| D17S1860      | chr17:39725782-39726150                         | F: GCGCAATCTCAGGTCA-FAM<br>R: ACCACCGTGTCTGGCTA              |
| GRN_GT15      | chr17:39790625-39790652                         | F: TCCCATTTCTCCCTTCTAGTTG-FAM<br>R: AAGTTGAGGCTGCAGGGTG      |

## SUPPLEMENTARY FIGURES

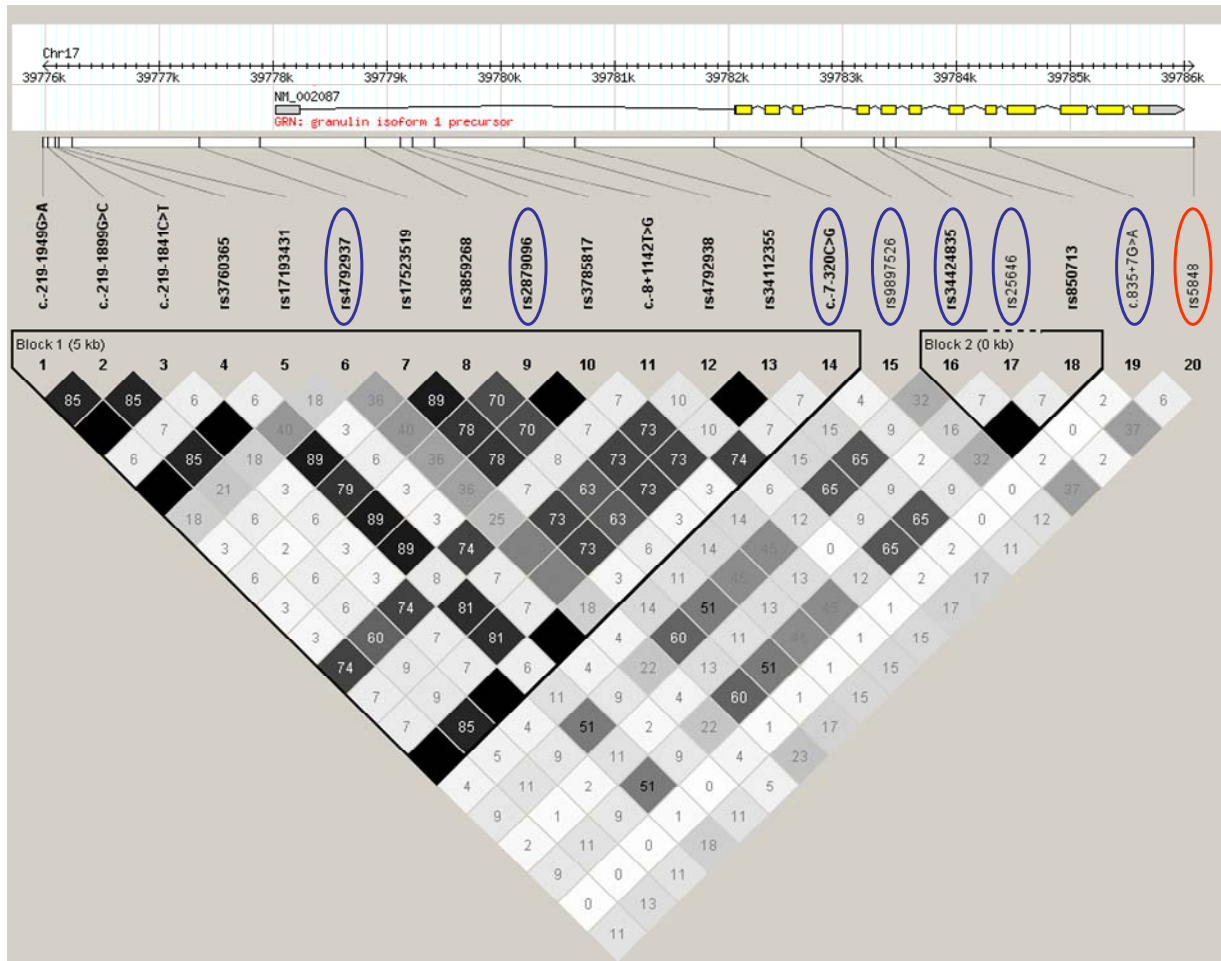**Supplementary Figure S1. *GRN* LD structure analyses in US population.** LD

relationships between pairs of each of the 20 SNPs in the *GRN* genomic region as determined in 24 US individuals. Each square represents the pairwise strength and significance of LD ( $r^2$ ). Black indicates no or minimal evidence of historic recombination ( $r^2=1$ ), white indicates no LD ( $r^2=0$ ), and shades of gray are uninformative LD. Tagging SNPs selected for genetic association studies are circled in blue, rs5848 located in the miR-659 binding site in the 3'UTR of *GRN* is circled in red.

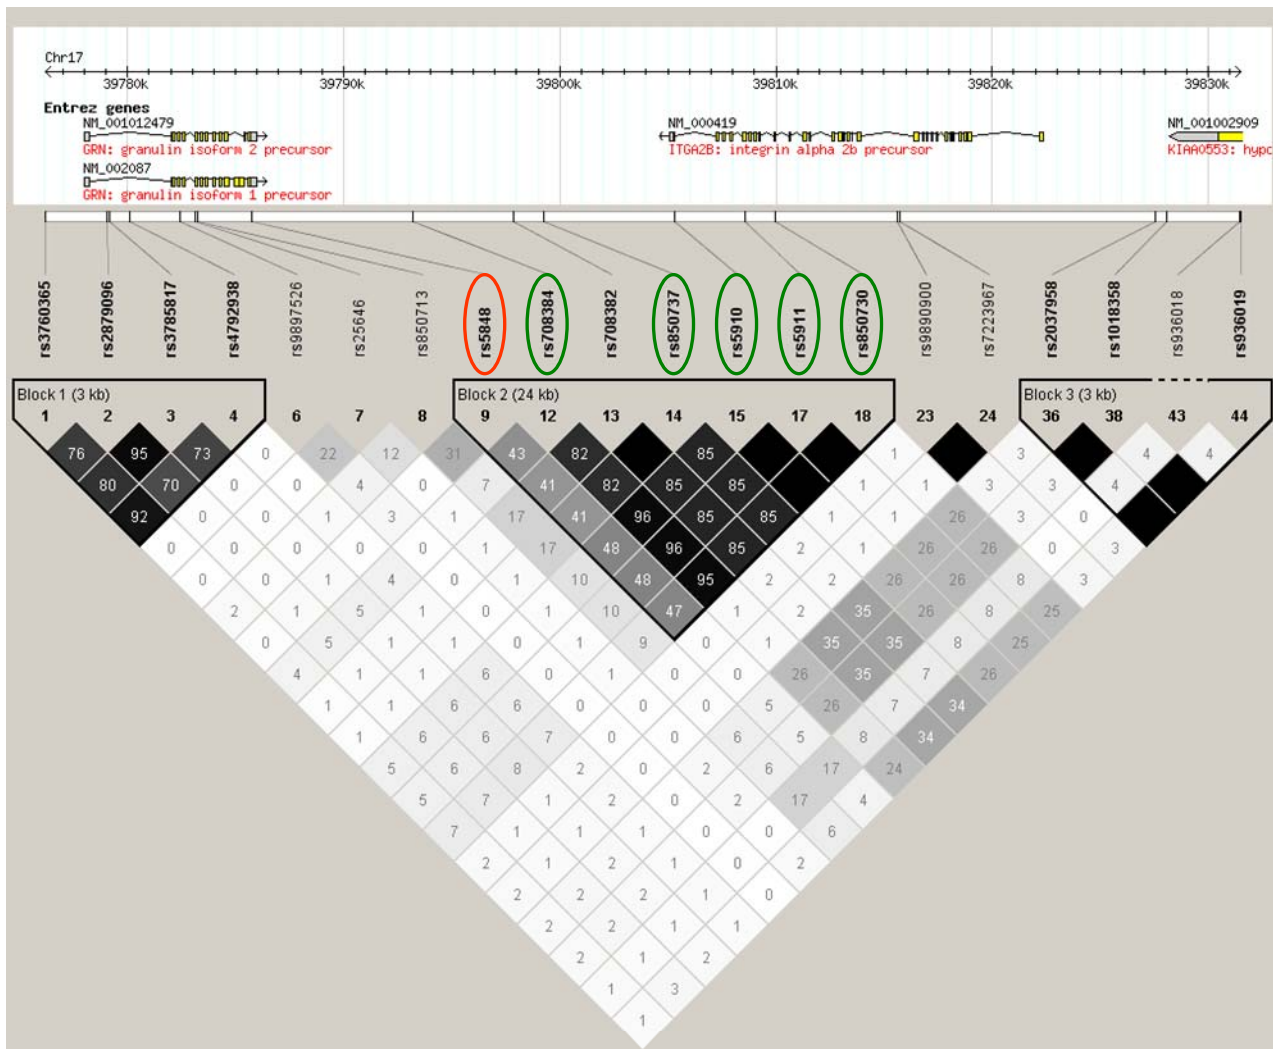

**Supplementary Figure S2. HapMap LD structure of *GRN* and downstream genomic region.** HapMap data showing the LD relationship between pairs of each of the SNPs in *GRN* and its downstream genomic region. Each square represents the pairwise strength and significance of LD ( $r^2$ ). Black indicates no or minimal evidence of historic recombination ( $r^2=1$ ), white indicates no LD ( $r^2=0$ ), and shades of gray are uninformative LD. SNPs located in the downstream haplotype block that were selected for genetic association studies are circled in green, rs5848 located in the miR-659 binding site in the 3'UTR of *GRN* is circled in red.

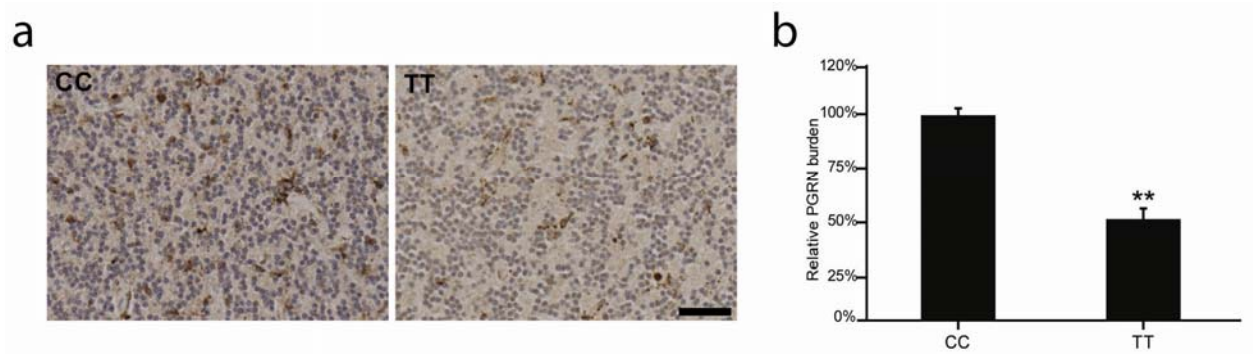

**Supplementary Figure S3. Correlation of rs5848 genotypes with GRN**

**immunohistochemistry.** (a) Representative *GRN* immunohistochemistry observed in granular cell layer of the cerebellum in FTL-D-U patients homozygous for the wild-type C-allele of rs5848 (left panel) or homozygous for the risk T-allele (right panel). Scale=50 $\mu$ M. (b) Quantification of the GRN burden in granular cell layer of the cerebellum in FTL-D-U patients using image analysis (N=5 in each group). GRN immunoreactivity was ~50% lower in FTL-D-U TT carriers compared to CC carriers. (\*\* indicates  $p < 0.001$ , two-tailed t-test).

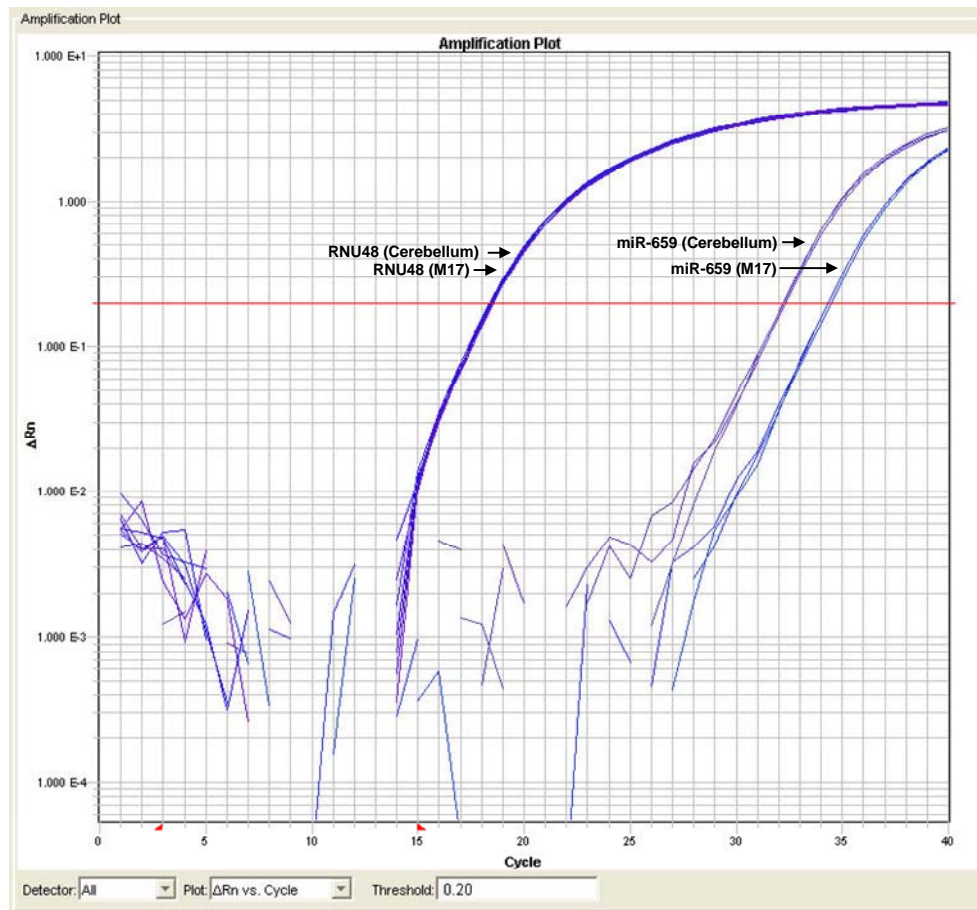

**Supplementary Figure S4. miR-659 is expressed in M17 cells and human cerebellar brain tissue.** Real-time PCR on RNA isolated from M17 cells and human cerebellar tissue revealed positive expression of miR-659. Cycle threshold ( $C_t$ ) values suggest slightly higher expression of miR-659 in cerebellum ( $C_t=32$ ) compared to M17 cells ( $C_t=34$ ). A probe specific to the ubiquitously expressed RNU48 (small nucleolar RNA, C/D box 48) was included as an endogenous control. Samples were run in triplicate and analyzed using SDSv2.2.2 software.
